# Supplementary material
Source: Springer Nature journal article supplement (https://www.springermedizin.de/resource/supplementary/12884_2014_965_MOESM1_ESM.pdf/9459314)
Supplement: MOESM1 [file 9459314]

**10-14 weeks' gestation:** Research midwife identifies eligible women by GP/midwife referral letters, USS, EPAU, ANC, Fetal Medicine

**14 weeks' gestation:** Research midwife approaches eligible women-verbal and written explanation of study given, permission sought to proceed

**14-15 weeks' gestation:** Research midwife makes telephone/ email contact to answer queries and obtain verbal consent

**DECLINED**  
Routine ANC.  
BMI, ethnicity, age & pregnancy outcome recorded (if agreed)

**Baseline/Randomisation visit:**  
*15<sup>+0</sup> - 18<sup>+6</sup> weeks' gestation*  
Eligibility confirmed; written informed consent obtained. **RANDOMISATION**, demography, maternal history, maternal family history, current pregnancy health. Questionnaires: dietary assessment (FFQ), binge eating, EQ-5D, IPAQ, EPDS. Anthropometry  
Samples : blood & urine

**CONSENT NOT GIVEN**  
Routine ANC.  
BMI, ethnicity, age & pregnancy outcome recorded (if agreed)

**CONTROL**  
Routine ANC

**28 week visit:**  
*27<sup>+0</sup> - 28<sup>+6</sup> weeks'*  
Consent confirmed  
Current pregnancy health  
Questionnaires FFQ, EQ-5D, EPDS, binge eating & IPAQ.  
Anthropometry  
Samples OGTT, Blood & urine.  
Fetal USS

**INTERVENTION**  
Appointment with Health Trainer followed by 8 weekly sessions

|                  |
|------------------|
| Session - week 1 |
| Session - week 2 |
| Session - week 3 |
| Session - week 4 |
| Session - week 5 |
| Session - week 6 |
| Session - week 7 |
| Session - week 8 |

Any time during study:  
**FATHER** consented for demography, DNA, anthropometry

**36 week visit:**  
*34<sup>+0</sup> - 36<sup>+0</sup> weeks'*  
Consent confirmed, current pregnancy health. Questionnaires: FFQ, EQ-5D, binge eating, EPDS, IPAQ.  
Anthropometry, Samples: blood & urine

**Pregnancy, Delivery and Neonatal Data:**  
Maternal late pregnancy, delivery data newborn data, neonatal anthropometry, cord blood sample, maternal postnatal and neonatal discharge information

**6 month Follow-Up**  
**Mother:** Registration- contact details, eligibility, consent. - demography, smoking, general health, Anthropometry.  
Samples. blood & urine  
Questionnaires: FFQ, EPDS, TFEQ-18, Binge eating, IPAQ, IBQR  
**Child-** eligibility, hospital admissions, medications & supplements. Anthropometry.  
Questionnaires: BEBQ, feeding & growth, early care/education; sleep and activity
